# Supplementary material for: Evaluation of the Hematological Patterns from Up to 985 Days of Long COVID: A Cross-Sectional Study
Source: MDPI journal article supplement (doi:10.3390/v15040879), 2023-03-29
Supplement: s1 [file s1]

**Table S1.** Adopted reference ranges for laboratory exams.

| Exam                                   | RR                                                           |
|----------------------------------------|--------------------------------------------------------------|
| RBCs, millions/mm <sup>3</sup>         | 4 – 5,6                                                      |
| Haemoglobin, g/dL                      | 12 – 16,5                                                    |
| Haematocrit, %                         | 35 – 47                                                      |
| MCV, fL                                | 81 – 101                                                     |
| MCH, pg                                | 27 – 34                                                      |
| MCHC, %                                | 31,5 – 36                                                    |
| RDW, %                                 | 11,5 – 16                                                    |
| ESR, mm                                | <15 <sup>(a)</sup> , <20 <sup>(b)</sup> , <30 <sup>(c)</sup> |
| WBCs, thousands/mm <sup>3</sup>        | 5 – 10                                                       |
| Neutrophils thousands/mm <sup>3</sup>  | 3 – 5                                                        |
| Eosinophils, /mm <sup>3</sup>          | 100 – 300                                                    |
| Basophils, /mm <sup>3</sup>            | 0 – 100                                                      |
| Monocytes, /mm <sup>3</sup>            | 200 – 400                                                    |
| Lymphocytes, thousands/mm <sup>3</sup> | 1,5 – 2,5                                                    |
| Platelets, thousands/mm <sup>3</sup>   | 150 – 450                                                    |
| MPV, fL                                | 6,2 – 11                                                     |
| Plateletcrit, %                        | 0,150 – 0,425                                                |
| PDW, %                                 | 18 – 22                                                      |
| PT, s                                  | 11 – 15                                                      |
| PT activity, %                         | 70 – 180                                                     |
| aPTT, s                                | 24 – 39                                                      |

(a), males <50 years; (b), males ≥50 years / females <50 years; (c), females ≥50 years. RR, reference range; RBCs, red blood cells; MCV, mean corpuscular volume; MCH, mean corpuscular haemoglobin; MCHC, mean corpuscular haemoglobin concentration; RDW, red cell distribution width; ESR, erythrocyte sedimentation rate; WBCs, white blood cells; MPV, mean platelet volume; PDW, platelet distribution width; PT, prothrombin time; aPTT, activated partial thromboplastin time.
